# Supplementary material for: Strain-induced phase transition and giant piezoelectricity in monolayer tellurene
Source: Royal Society of Chemistry journal article supplement (doi:10.1039/c9nr06507e), 2019-11-25
Supplement: c9nr06507e1.pdf [file c9nr06507e1.pdf]

electronic supplementary information for

# **Strain-induced phase transition and piezoelectricity in monolayer tellurene**

Xueru Cai<sup>a#</sup>, Yangyang Ren<sup>b#</sup>, Menghao Wu<sup>b</sup>, Dongwei Xu<sup>a\*</sup>, Xiaobing Luo<sup>a</sup>

<sup>a</sup>State Key Laboratory of Coal Combustion, School of Energy and Power Engineering, Huazhong University of Science and Technology, Wuhan, Hubei 430074, China.

Email: dwxu@hust.edu; luoxb@hust.edu.cn

<sup>b</sup>School of Physics and National High Magnetic Field Center, Huazhong University of Science and Technology, Wuhan, Hubei 430074, China.

#Equal contribution

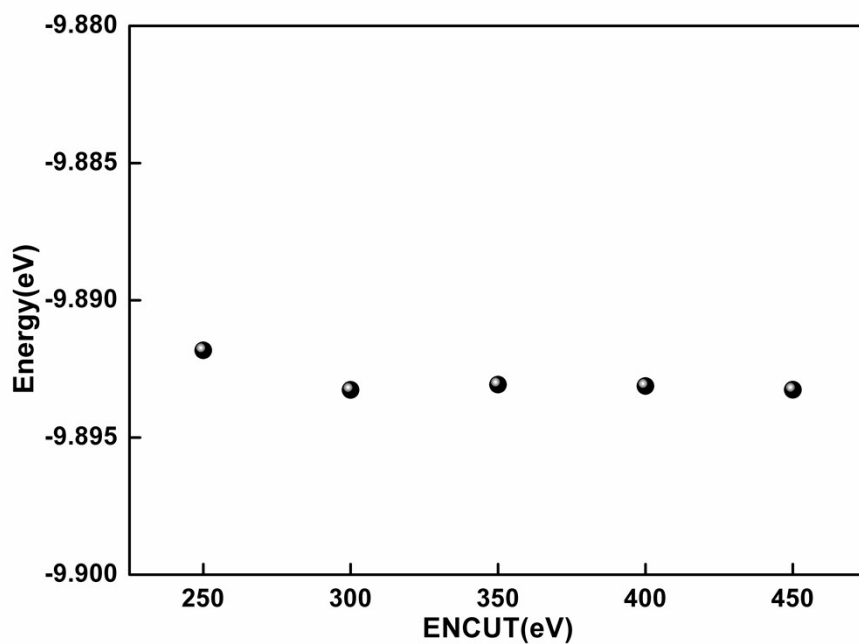

Fig. S1 The total energy convergence with plane wave cutoff ENCUT.

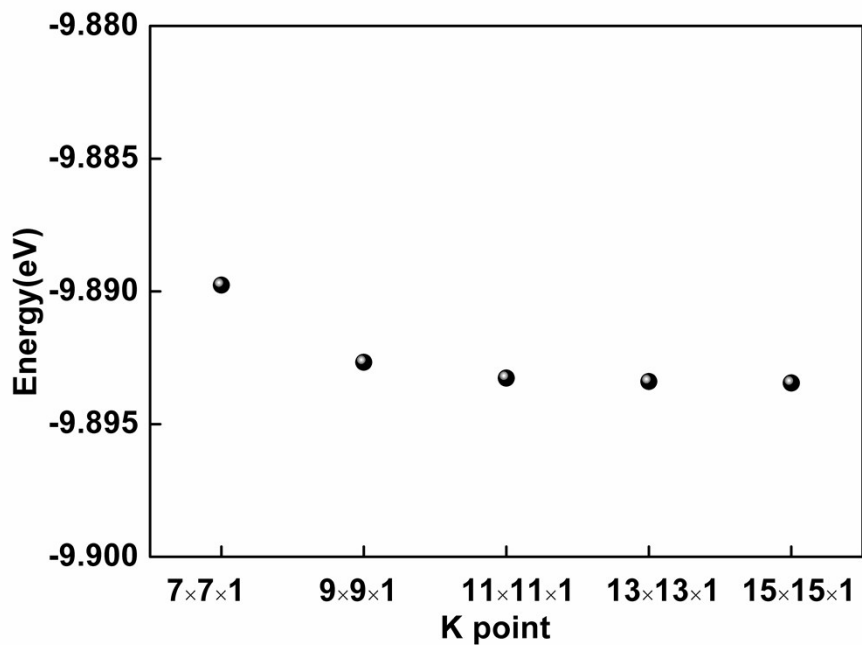

Fig. S2 The total energy convergence with K points.

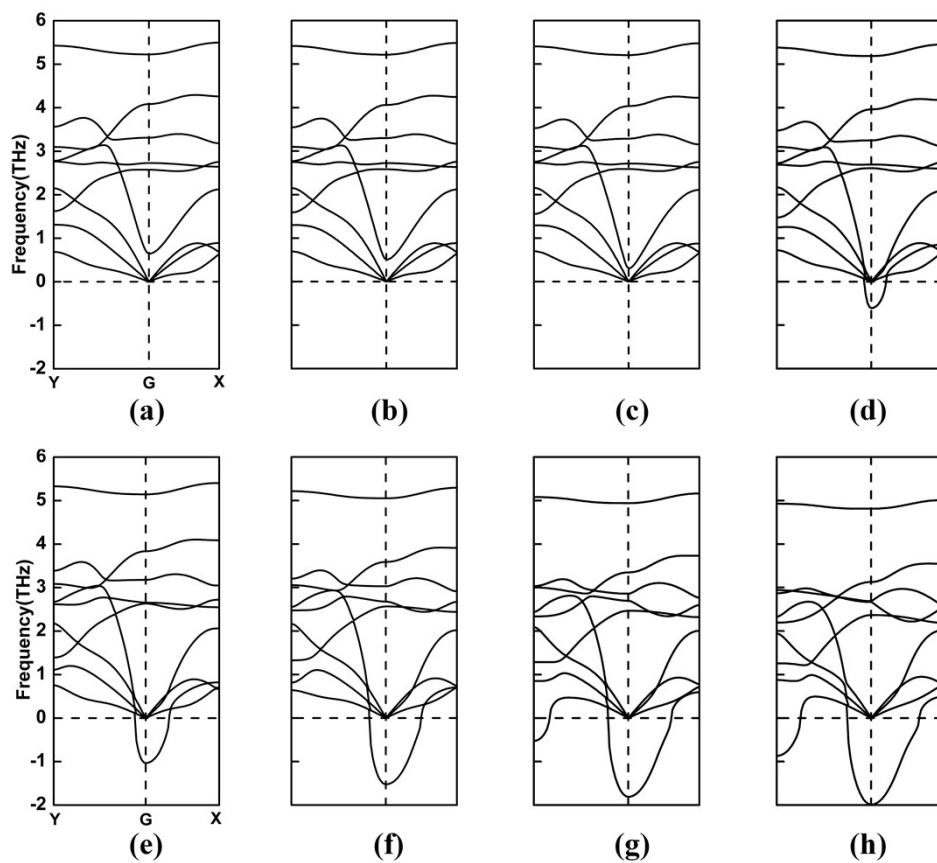

Fig. S3 Phonon spectra for  $\beta$  tellurene under different biaxial tensile strains: (a)0%; (b)0.2%; (c)0.4%; (d)1%; (e)2%; (f)4%; (g)6%; (h)8%

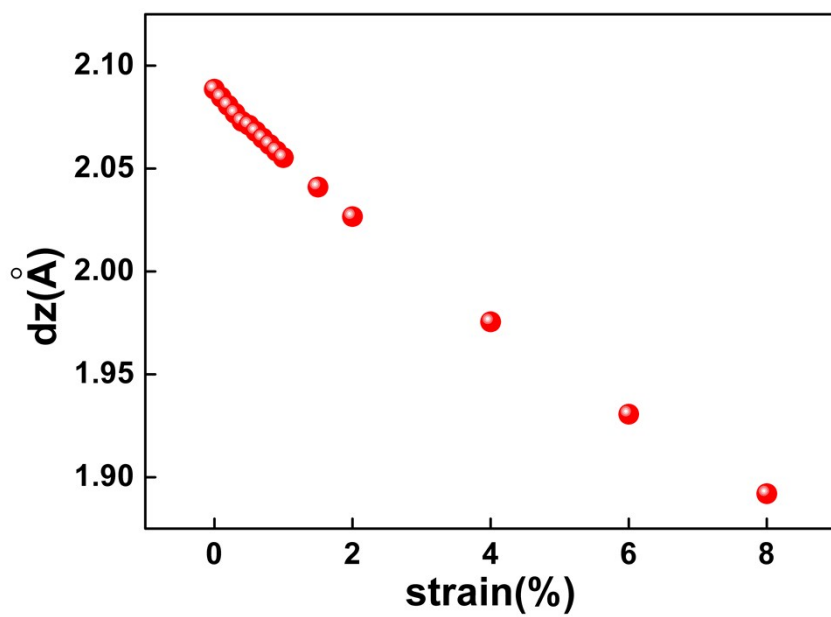

Fig. S4 The variation of  $dz$  under different strain.  $dz$  represents the height of buckling.

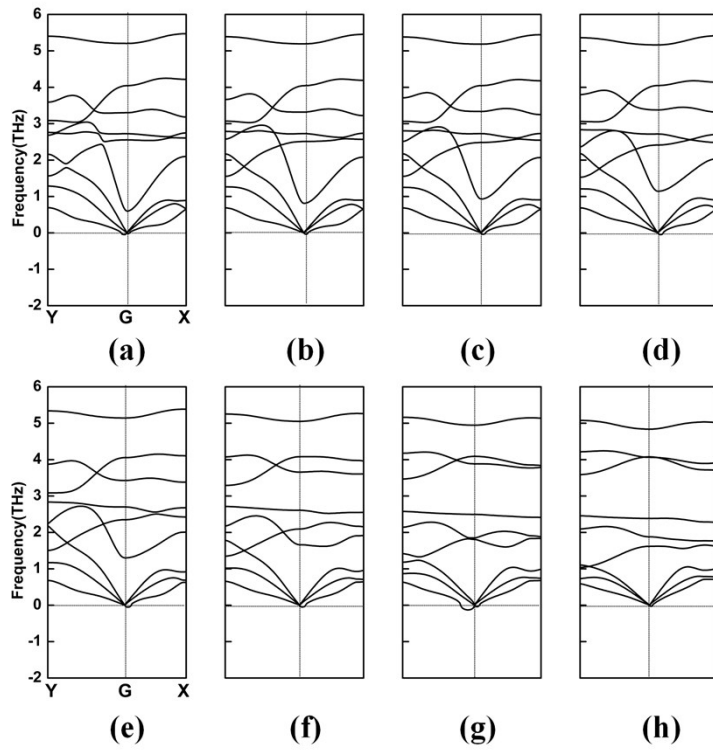

Fig.S5 Phonon spectra for  $\alpha$  tellurene under different biaxial strains: (a)0.5%; (b)0.8%; (c)1%; (d)1.5%; (e)2%; (f)4%; (g)6%; (h)8%.

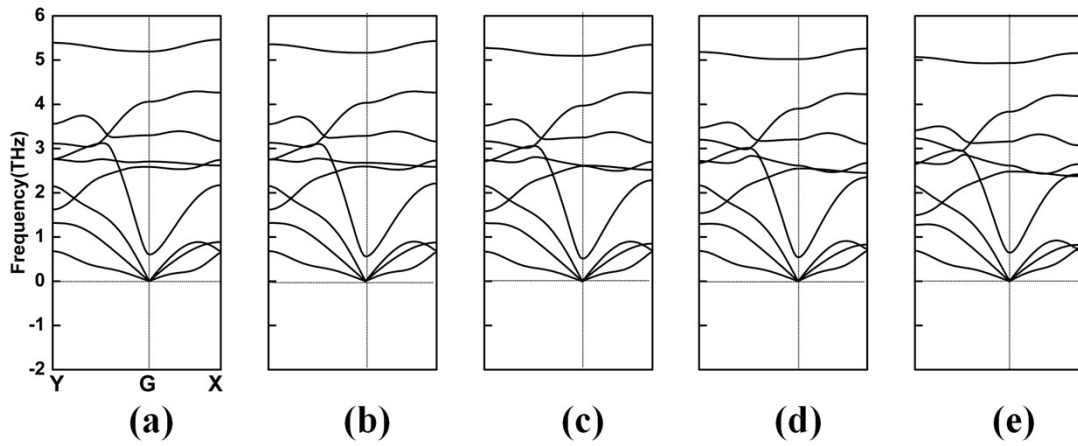

Fig.S6 Phonon spectra for  $\beta$  tellurene under different uniaxial strains in x direction: (a)1%; (b)2%; (c)4%; (d)6%; (e)8%. The imaginary frequency free spectrums indicate the stability of the  $\beta$  phase tellurene under strain along x-axis.

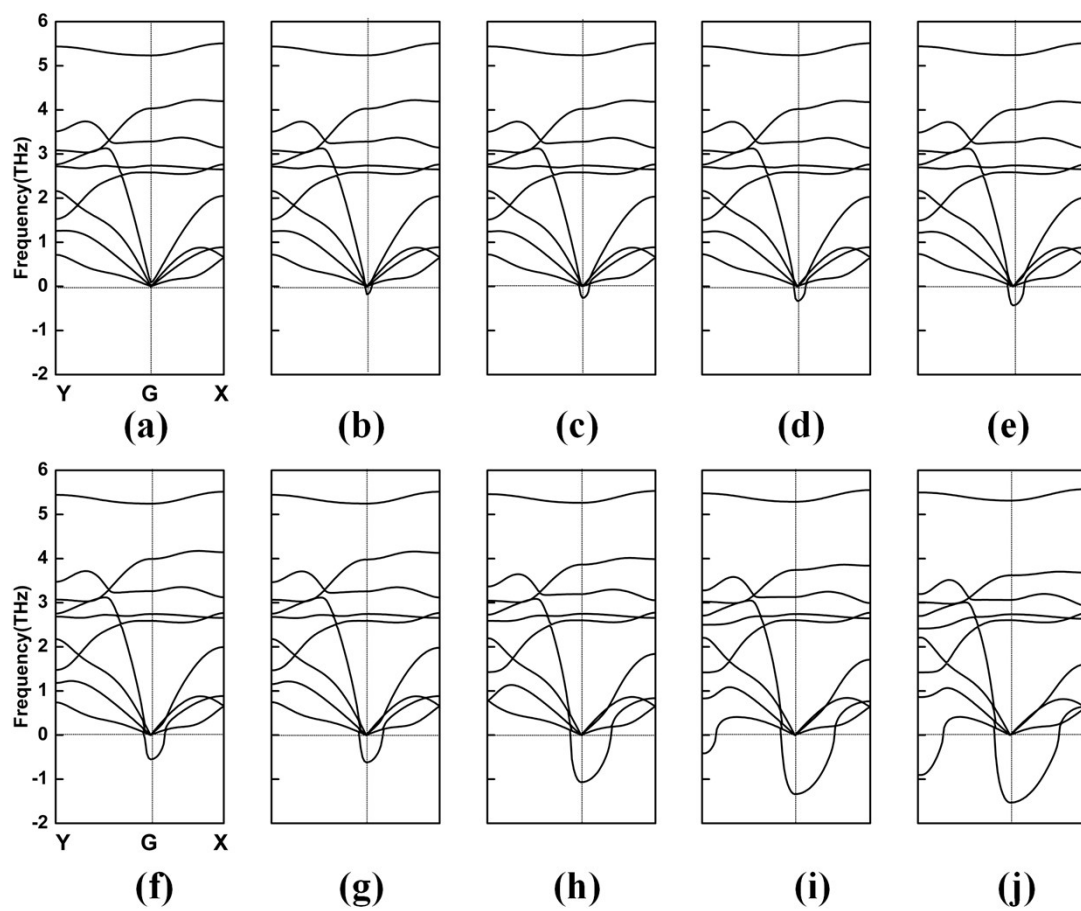

Fig.S7 Phonon spectra for  $\beta$  tellurene under different uniaxial strains in y direction: (a)1%; (b)1.1%; (c)1.2%; (d)1.3%; (e)1.5%;(f)1.8%;(g)2%;(h)4%;(i)6%;(j)8%.

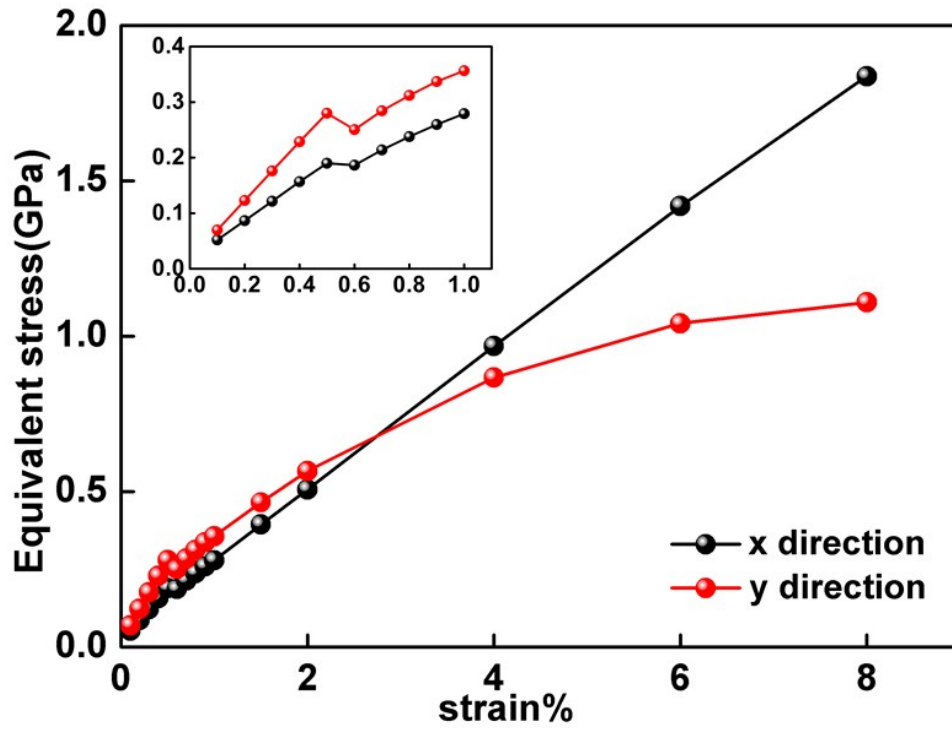

Fig.S8 The relationship between stress and strain under biaxial strain. The stresses in x direction and y direction are represented by black and red dots respectively. For the existence of vacuum space, the equivalent stress is adjusted by multiplying  $L/d$ , where  $L$  is the total length of lattice (include vacuum space),  $d$  is the thickness of tellurene (summation of buckling height and vdW radius of Te atom).
